# Supplementary material for: HSA-Binding Prodrugs-Based Nanoparticles Endowed with Chemo and Photo-Toxicity against Breast Cancer
Source: MDPI journal article supplement (doi:10.3390/cancers14040877), 2022-02-10
Supplement: s1 [file s1]

# HSA-binding prodrugs-based nanoparticles endowed with chemo and photo-toxicity against breast cancer

Valentina Rapozzi<sup>1,†</sup>, Francesca Moret<sup>2,†</sup>, Luca Menilli<sup>2</sup>, Andrea Guerrini<sup>3</sup>, , Daniele Tedesco<sup>3</sup>, Marina Naldi<sup>4</sup>, Manuela Bartolini<sup>4</sup>, Mariachiara Gani<sup>1</sup>, Sonia Zorzet<sup>5</sup>, Marta Columbaro<sup>6</sup>, Celeste Milani<sup>2</sup>, Cecilia Martini<sup>3</sup>, Claudia Ferroni<sup>3,\*</sup> and Greta Varchi<sup>3,\*</sup>

## Supplementary Information

### Table of Content

#### Supplementary Figures

|                                                                                                                                                                                                                                                                                                                                                                                                                                                                                                                                                                                                                                          |    |
|------------------------------------------------------------------------------------------------------------------------------------------------------------------------------------------------------------------------------------------------------------------------------------------------------------------------------------------------------------------------------------------------------------------------------------------------------------------------------------------------------------------------------------------------------------------------------------------------------------------------------------------|----|
| <b>Figure S1.</b> <sup>1</sup> H-NMR spectrum of derivative <b>4</b> (500 MHz, CDCl <sub>3</sub> ). .....                                                                                                                                                                                                                                                                                                                                                                                                                                                                                                                                | 3  |
| <b>Figure S2.</b> <sup>1</sup> H-NMR spectrum of <b>MAL</b> derivative (500 MHz, DMSO). .....                                                                                                                                                                                                                                                                                                                                                                                                                                                                                                                                            | 3  |
| <b>Figure S3.</b> <sup>1</sup> H-NMR spectrum of <b>BOC</b> derivative (500 MHz, DMSO). .....                                                                                                                                                                                                                                                                                                                                                                                                                                                                                                                                            | 4  |
| <b>Figure S4.</b> Optimization of nanoparticles preparation. a) Size trend by varying the % amount of PTX <sub>2</sub> S and <b>MAL</b> ; b) Polydispersity index (PDI) trend by varying the % amount of PTX <sub>2</sub> S and <b>MAL</b> . .....                                                                                                                                                                                                                                                                                                                                                                                       | 4  |
| <b>Figure S5.</b> TEM image of <b>BOC</b> -PTX <sub>2</sub> S@Pba nanoparticle (scale bar 1mm). .....                                                                                                                                                                                                                                                                                                                                                                                                                                                                                                                                    | 5  |
| <b>Figure S6.</b> Particle size stability of <b>BOC</b> -PTX <sub>2</sub> S@Pba NPs in FBS 20% in PBS pH 7.4, v/v (green dotted line), and HSA 35 mg/mL in PBS pH 7.4, v/v (orange dotted line), as determined by DLS analysis. ....                                                                                                                                                                                                                                                                                                                                                                                                     | 5  |
| <b>Figure S7.</b> HPLC-UV chromatograms at 228 nm for the release kinetics of <b>MAL</b> -PTX <sub>2</sub> S@Pba NPs, as obtained by dialysis experiments in redox-neutral (medium <b>A</b> ), strongly reducing (medium <b>C</b> ) and strongly oxidizing (medium <b>E</b> ) conditions. Experimental conditions are reported in the Main Text (Paragraph 2.5). ....                                                                                                                                                                                                                                                                    | 6  |
| <b>Figure S8.</b> Kinetic evolution of relative peak areas for PTX <sub>2</sub> S ( <i>left</i> ) and PTX ( <i>right</i> ), as determined by HPLC-UV analysis on PTX <sub>2</sub> S solutions in different redox conditions. <i>Diamonds</i> : redox-neutral; <i>empty circles</i> : mildly reducing; <i>filled circles</i> : strongly reducing; <i>empty squares</i> : mildly oxidizing; <i>filled squares</i> : strongly oxidizing. ....                                                                                                                                                                                               | 7  |
| <b>Figure S9.</b> Dose and time-dependent adduct formation between <b>MAL</b> and HSA. ....                                                                                                                                                                                                                                                                                                                                                                                                                                                                                                                                              | 8  |
| <b>Figure S10.</b> In vitro uptake of the different Pba formulations in MCF10A cells cultured as monolayers. Cells were incubated for 1 or 4h with 0.25 μM of Pba dissolved in the standard solvent or loaded in <b>MAL</b> -PTX <sub>2</sub> S@Pba or in <b>BOC</b> -PTX <sub>2</sub> S@Pba, and the uptake of Pba was measured by flow cytometry at the end of incubation times. Data are expressed as mean percentage ± SD of least two independent experiments, carried out in triplicate. Statistical significance was calculated applying the two-way ANOVA with Bonferroni's correction: # significantly different from Pba. .... | 8  |
| <b>Figure S11.</b> Absorption spectra of 10 μM Pba, <b>MAL</b> -PTX <sub>2</sub> S@Pba and <b>BOC</b> -PTX <sub>2</sub> S@Pba diluted in water. ....                                                                                                                                                                                                                                                                                                                                                                                                                                                                                     | 9  |
| <b>Figure S12.</b> Cytotoxicity measured in 4T1 cells incubated with increasing concentrations of free PTX for 24h and release in drug-free medium for additional 48h before assessing cell viability with the MTS assay. Data are expressed as mean percentage ± SD of least three independent experiments, carried out in triplicate. ....                                                                                                                                                                                                                                                                                             | 9  |
| <b>Figure S13.</b> The motility of MCF-7 cells (a) and MDA-MB-231 cells (b) was measured by wound healing assay. Phase-contrast microscopy images (scale bar: 100 μM) at the beginning of the experiment (0h) and the end point (70h for MCF-7 and 30h for MDA-MB-231 cells). ....                                                                                                                                                                                                                                                                                                                                                       | 9  |
| <b>Figure S14.</b> Combination index analysis. Fa-CI plots of Combination Index vs. Fa relative to MDA-MB-231, MCF-7 and 4T1 cells treated with the combination of PTX and Pba loaded in <b>MAL</b> -PTX <sub>2</sub> S@Pba or <b>BOC</b> -PTX <sub>2</sub> S@Pba. Data reported in Fig. 5 d-f of the main text were analyzed with the Compusyn software and Fa-CI plots derived. ....                                                                                                                                                                                                                                                   | 10 |

**Figure S15.** Dark cytotoxicity measured in 4T1 spheroids incubated with the different drugs/combinations for 24h and maintained in drug-free medium for additional 24 (a) or 48 (b) h before assessing cell viability by measuring ATP levels with the 3D Glo assay. Data are expressed as mean percentage  $\pm$  SD of at least two independent experiments, carried out in quadruplicate. Statistical significance was calculated applying the ANOVA Two-way with Bonferroni's correction: # significantly different from Pba. ....10

**Figure S16.** Dark cytotoxicity measured in MDA-MB-231 spheroids incubated with the different drugs/combinations for 24h and maintained in drug-free medium for additional 24 (a) or 48 (b) h before assessing cell viability by measuring ATP levels with the 3D Glo assay. Data are expressed as mean percentage  $\pm$  SD of at least two independent experiments, carried out in quadruplicate. Statistical significance was calculated applying the ANOVA Two-way with Bonferroni's correction: • significantly different from **BOC-PTX<sub>2</sub>S@Pba**; # significantly different from Pba; \$ significantly different from **nPTX<sub>2</sub>S**. ....10

**Figure S17.** Quantification of fluorescence intensity in 4T1 and MDA-MB-231 spheroids stained with the LIVE/DEAD kit. The images reported in Figure 9 (4T1 spheroids) and 10 (MDA-MB-231 spheroids) were quantified using ImageJ software in order to quantify the fluorescence intensity from live cells (stained by calcein AM, green fluorescence) and dead cells (stained by Ethidium homodimer-1 (EthD-1), red fluorescence). a) quantification of images in Fig. 9 c; b) quantification of images in Fig. 9 d; c) quantification of images in Fig. 10 c; d) quantification of images in Fig. 10 d. ....11

### *Supplementary tables*

**Table S1.** List of PTX derivatives observed in HPLC-UV analysis. ....5

**Table S2.** List of Pba derivatives observed in HPLC-UV analysis. Experimental conditions are reported in the Main Text (Paragraph 2.5). ....6

**Table S3.** Cumulative peak areas and released amounts for PTX and Pba at different dialysis times, as determined by HPLC-UV analysis in release experiments on **MAL-PTX<sub>2</sub>S@Pba** NPs. Experimental conditions are reported in the Main Text (Paragraph 2.5). ....7

**Table S4.** IC<sub>50</sub> values calculated by the Compusyn software from the photo-toxicity data (Figure 6 g,j) of MDA-MB-231 and 4T1 spheroids exposed to the different drug formulations/combinations and irradiated with 1 J/cm<sup>2</sup> of red light. ....12

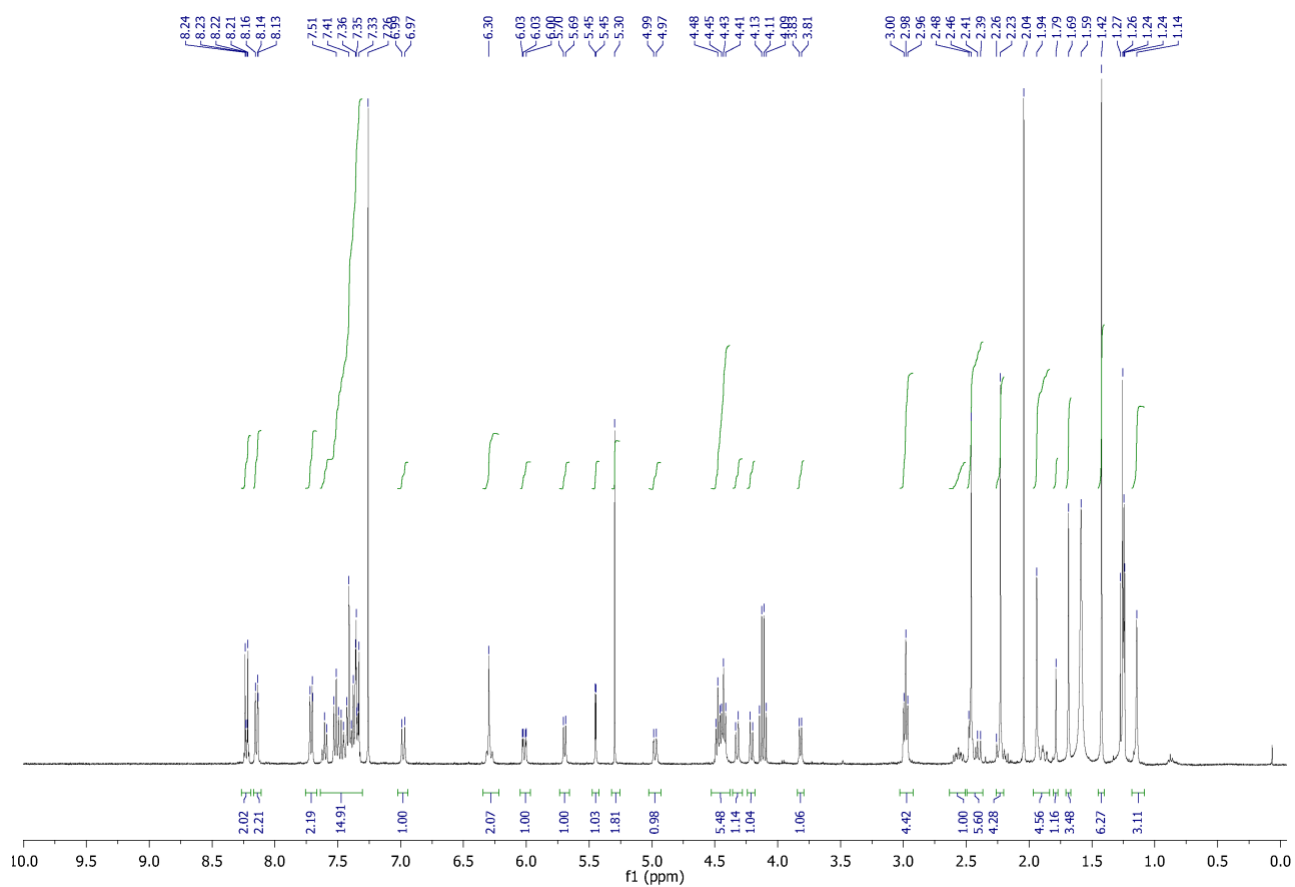

**Figure S1.**  $^1\text{H}$ -NMR spectrum of derivative **4** (500 MHz,  $\text{CDCl}_3$ ).

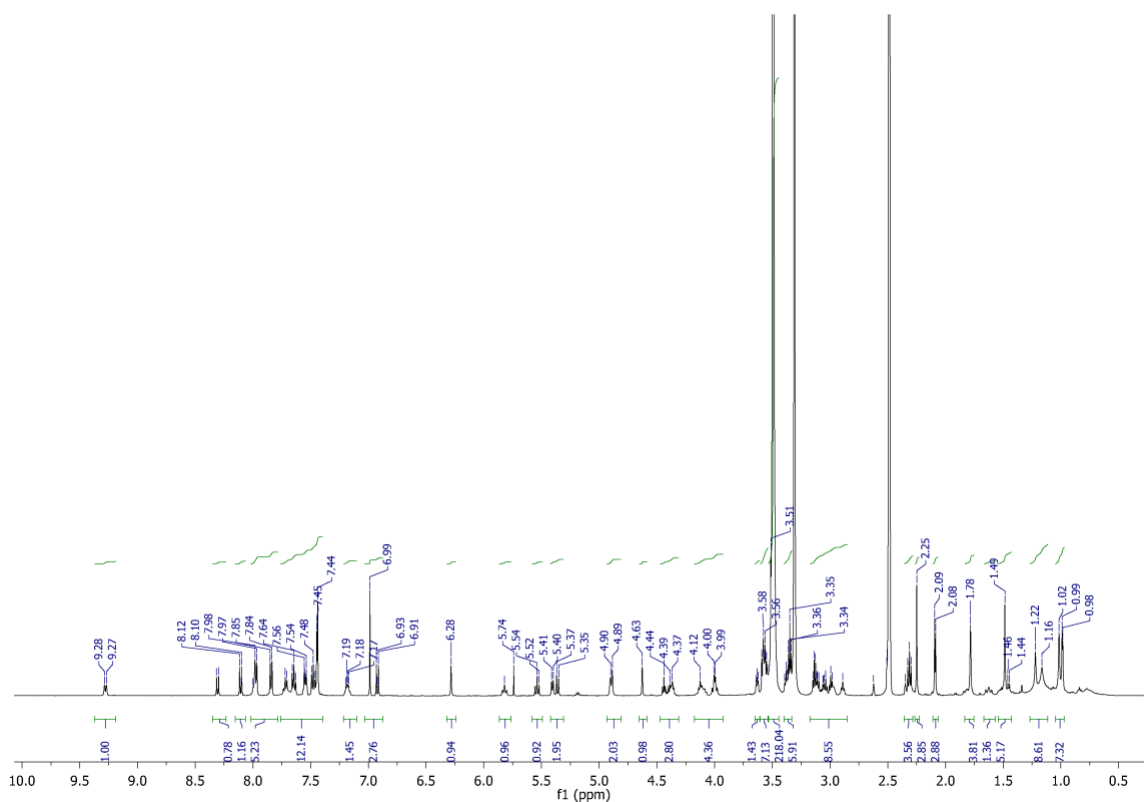

**Figure S2.**  $^1\text{H}$ -NMR spectrum of **MAL** derivative (500 MHz,  $\text{DMSO}$ ).

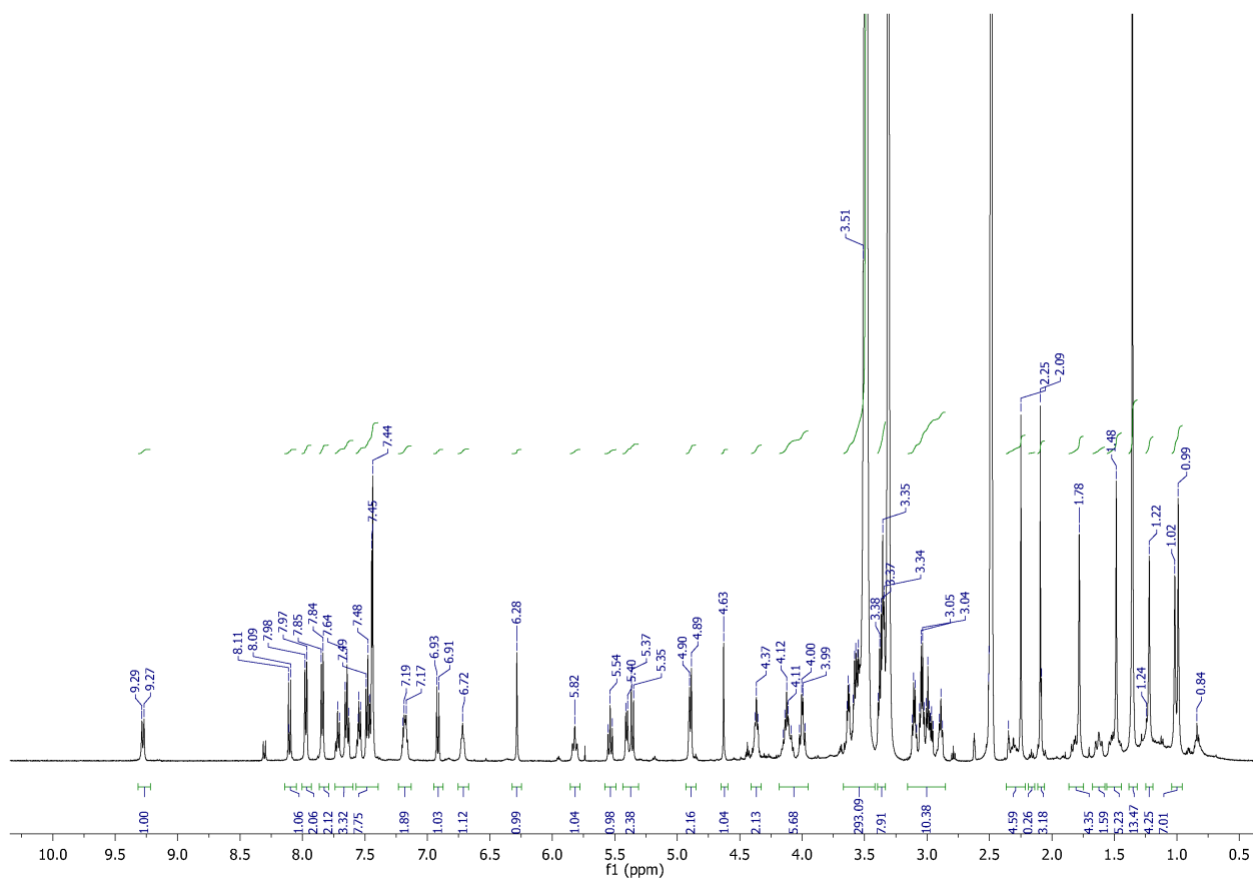

**Figure S3.**  $^1\text{H}$ -NMR spectrum of BOC derivative (500 MHz, DMSO).

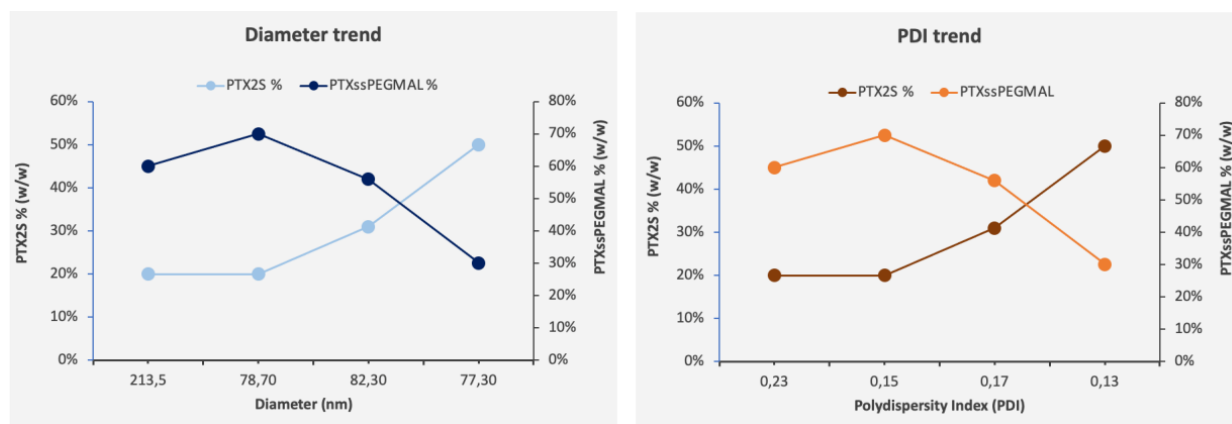

**Figure S4.** Optimization of nanoparticles preparation. a) Size trend by varying the % amount of PTX<sub>2</sub>S and MAL; b) Polydispersity index (PDI) trend by varying the % amount of PTX<sub>2</sub>S and MAL.

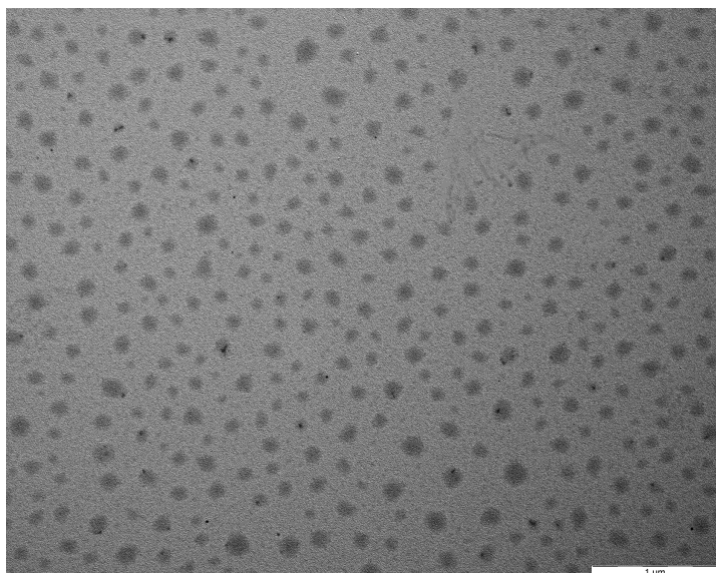

**Figure S5.** TEM image of **BOC-PTX<sub>2</sub>S@Pba** nanoparticle (scale bar 1mm).

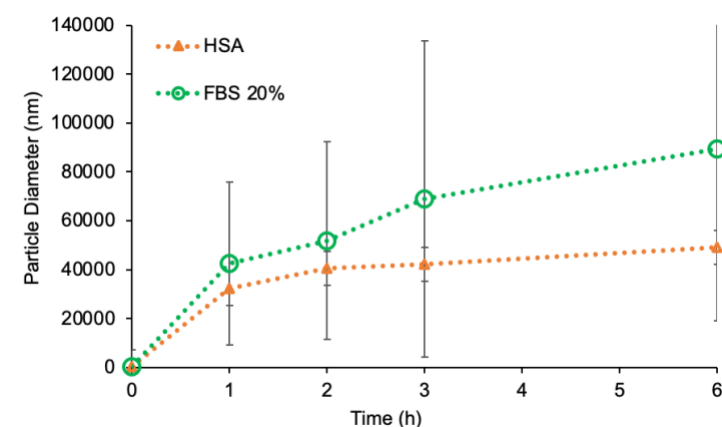

**Figure S6.** Particle size stability of **BOC-PTX<sub>2</sub>S@Pba** NPs in FBS 20% in PBS pH 7.4, v/v (green dotted line), and HSA 35 mg/mL in PBS pH 7.4, v/v (orange dotted line), as determined by DLS analysis.

**Table S1.** List of PTX derivatives observed in HPLC-UV analysis.

Experimental conditions are reported in the Main Text (Paragraph 2.5).

| <i>Used in cumulative peak area</i>          | <i>t<sub>R</sub> (min)</i> | <b>Identity</b> | <b>Notes</b>                                                                                |
|----------------------------------------------|----------------------------|-----------------|---------------------------------------------------------------------------------------------|
| Paclitaxel dimer ( <b>PTX<sub>2</sub>S</b> ) | 6.546                      | verified        |                                                                                             |
| Paclitaxel ( <b>PTX</b> )                    | 4.744                      | verified        |                                                                                             |
| 7-Epipaclitaxel ( <b>ePTX</b> )              | 5.257                      | verified        |                                                                                             |
| Baccatin III ( <b>B3</b> )                   | 3.308                      | verified        |                                                                                             |
| Paclitaxel dimer fragment 1                  | 4.769                      | proposed        | shoulder to the PTX peak, disappearing at long times                                        |
| Paclitaxel dimer fragment 2                  | 5.044                      | proposed        | more intense in oxidizing conditions                                                        |
| Paclitaxel dimer fragment 3                  | 5.725                      | proposed        | less intense in oxidizing conditions                                                        |
| 10-Deacetylpaclitaxel ( <b>dPTX</b> )        | 4.135                      | proposed        | more intense in oxidizing conditions                                                        |
| 10-Deacetyl-7-epipaclitaxel ( <b>dePTX</b> ) | 4.383                      | proposed        | only in oxidizing conditions                                                                |
| <i>Not used in cumulative peak area</i>      | <i>t<sub>R</sub> (min)</i> | <b>Identity</b> | <b>Notes</b>                                                                                |
| Paclitaxel side chain ( <b>PSC</b> )         | 2.250                      | proposed        |                                                                                             |
| unknown derivative                           | 2.386                      | —               | only in strongly oxidizing conditions                                                       |
| possible <b>MAL</b> derivative               | 2.516                      | —               | very intense, only in strongly reducing conditions from <b>MAL-PTX<sub>2</sub>S@Pba</b> NPs |
| unknown derivative                           | 2.586                      | —               | only from <b>MAL-PTX<sub>2</sub>S@Pba</b> NPs                                               |

**Table S2.** List of Pba derivatives observed in HPLC-UV analysis. Experimental conditions are reported in the Main Text (Paragraph 2.5).

|                                                   | $t_R$ (min) | HRMS (ESI, $m/z$ )<br>[M-H] <sup>-</sup> | Notes                                                                           |
|---------------------------------------------------|-------------|------------------------------------------|---------------------------------------------------------------------------------|
| Pheophorbide a ( <b>Pba</b> )                     | 8.238       | 591.2618                                 |                                                                                 |
| <sup>132</sup> -Epipheophorbide a ( <b>ePba</b> ) | 8.526       | 591.2622                                 | present in the commercial mixture of stereoisomers                              |
| unknown isomer                                    | 6.846       | 591.2621                                 | trace amounts in the commercial mixture of stereoisomers                        |
| oxidized derivative                               | 8.035       | 607.2571                                 |                                                                                 |
| oxidized derivative                               | 7.048       | 607.2575                                 |                                                                                 |
| di-oxidized derivative                            | 7.494       | 623.2518                                 |                                                                                 |
| di-oxidized dehydrogenated derivative             | 7.358       | 621.2365                                 | no absorption due to the porphyrin Q <sub>0-0</sub> <sup>y</sup> band (~650 nm) |

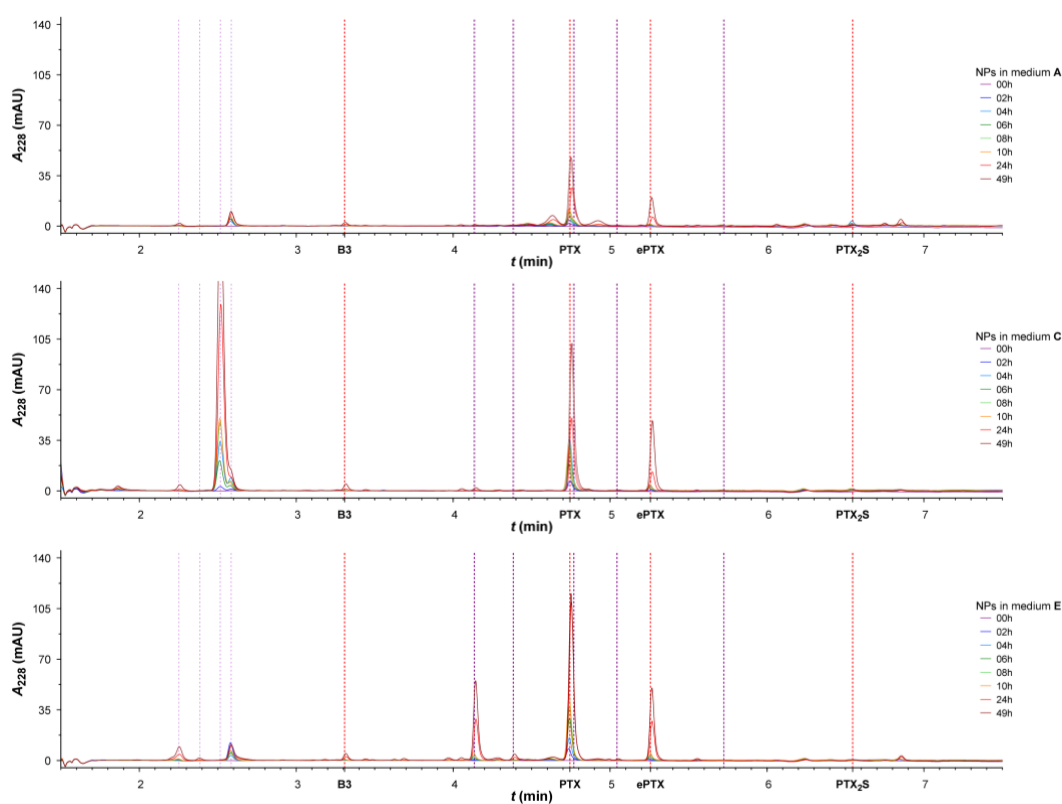

**Figure S7.** HPLC-UV chromatograms at 228 nm for the release kinetics of **MAL-PTX<sub>2</sub>S@Pba** NPs, as obtained by dialysis experiments in redox-neutral (medium **A**), strongly reducing (medium **C**) and strongly oxidizing (medium **E**) conditions. Experimental conditions are reported in the Main Text (Paragraph 2.5).

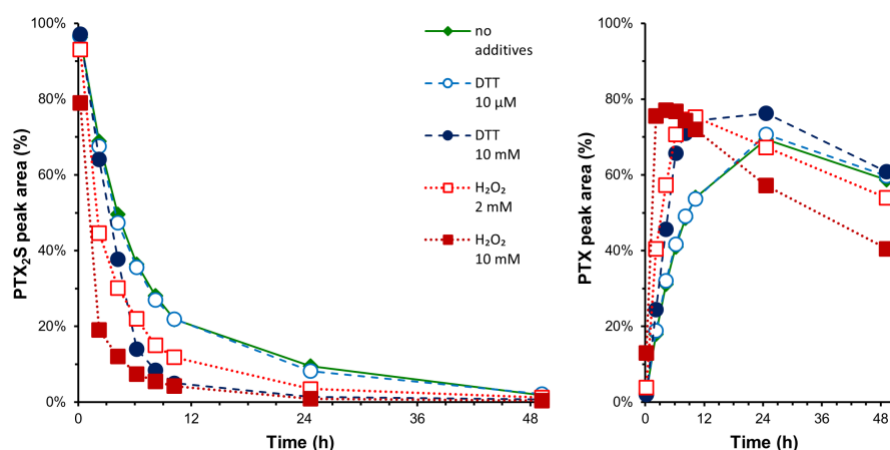

**Figure S8.** Kinetic evolution of relative peak areas for PTX<sub>2</sub>S (*left*) and PTX (*right*), as determined by HPLC-UV analysis on PTX<sub>2</sub>S solutions in different redox conditions. *Diamonds*: redox-neutral; *empty circles*: mildly reducing; *filled circles*: strongly reducing; *empty squares*: mildly oxidizing; *filled squares*: strongly oxidizing. Redox conditions are described in detail in the Main Text (Paragraph 2.5).

**Table S3.** Cumulative peak areas and released amounts for PTX and Pba at different dialysis times, as determined by HPLC-UV analysis in release experiments on MAL-PTX<sub>2</sub>S@Pba NPs. Experimental conditions are reported in the Main Text (Paragraph 2.5).

| Release medium A  | PTX *                |                  | Pba **               |                  |
|-------------------|----------------------|------------------|----------------------|------------------|
| Dialysis time (h) | Cumulative peak area | Release (% w/w)  | Cumulative peak area | Released (% w/w) |
| 0.176             | 1959                 | 0.2%             | 0                    | 0.0%             |
| 2.170             | 6836                 | 0.5%             | 33924                | 1.2%             |
| 4.178             | 18894                | 1.5%             | 105976               | 3.7%             |
| 6.179             | 23347                | 1.8%             | 114554               | 4.0%             |
| 8.181             | 31305                | 2.5%             | 137474               | 4.8%             |
| 10.182            | 36086                | 2.9%             | 158613               | 5.5%             |
| 24.631            | 81972                | 6.5%             | 206830               | 7.2%             |
| 49.179            | 162280               | 12.8%            | 314437               | 10.9%            |
| Release medium B  | PTX *                |                  | Pba **               |                  |
| Dialysis time (h) | Cumulative peak area | Released (% w/w) | Cumulative peak area | Released (% w/w) |
| 0.192             | 2314                 | 0.2%             | 0                    | 0.0%             |
| 2.185             | 9552                 | 0.8%             | 34247                | 1.2%             |
| 4.195             | 18428                | 1.5%             | 96766                | 3.3%             |
| 6.197             | 25900                | 2.1%             | 120146               | 4.2%             |
| 8.198             | 34209                | 2.7%             | 145136               | 5.0%             |
| 10.199            | 45769                | 3.6%             | 170888               | 5.9%             |
| 24.647            | 102577               | 8.1%             | 280563               | 9.7%             |
| 49.196            | 165702               | 13.1%            | 358040               | 12.4%            |
| Release medium C  | PTX *                |                  | Pba **               |                  |
| Dialysis time (h) | Cumulative peak area | Released (% w/w) | Cumulative peak area | Released (% w/w) |
| 0.190             | 1528                 | 0.1%             | 0                    | 0.0%             |
| 2.184             | 18757                | 1.5%             | 28617                | 1.0%             |
| 4.195             | 82483                | 6.5%             | 57885                | 2.0%             |
| 6.197             | 48294                | 3.8%             | 71536                | 2.5%             |
| 8.198             | 85516                | 6.8%             | 76915                | 2.7%             |
| 10.200            | 77280                | 6.1%             | 90032                | 3.1%             |
| 24.648            | 144676               | 11.5%            | 124442               | 4.3%             |
| 49.197            | 346656               | 27.4%            | 239708               | 8.3%             |
| Release medium D  | PTX *                |                  | Pba **               |                  |
| Dialysis time (h) | Cumulative peak area | Release (% w/w)  | Cumulative peak area | Release (% w/w)  |
| 0.189             | 2161                 | 0.2%             | 224                  | 0.0%             |
| 2.183             | 5912                 | 0.5%             | 19368                | 0.7%             |
| 4.195             | 19890                | 1.6%             | 68715                | 2.4%             |

|                          |                             |                         |                             |                         |
|--------------------------|-----------------------------|-------------------------|-----------------------------|-------------------------|
| 6.197                    | 34608                       | 2.7%                    | 115358                      | 4.0%                    |
| 8.198                    | 47484                       | 3.8%                    | 140194                      | 4.9%                    |
| 10.200                   | 59457                       | 4.7%                    | 150739                      | 5.2%                    |
| 24.648                   | 135206                      | 10.7%                   | 219564                      | 7.6%                    |
| 49.198                   | 217738                      | 17.2%                   | 249274                      | 8.6%                    |
| <b>Release medium E</b>  |                             | <b>PTX *</b>            | <b>Pba **</b>               |                         |
| <b>Dialysis time (h)</b> | <b>Cumulative peak area</b> | <b>Released (% w/w)</b> | <b>Cumulative peak area</b> | <b>Released (% w/w)</b> |
| 0.188                    | 1269                        | 0.1%                    | 0                           | 0.0%                    |
| 2.182                    | 20341                       | 1.6%                    | 39110                       | 1.4%                    |
| 4.195                    | 38714                       | 3.1%                    | 65896                       | 2.3%                    |
| 6.197                    | 72190                       | 5.7%                    | 98402                       | 3.4%                    |
| 8.198                    | 96226                       | 7.6%                    | 116246                      | 4.0%                    |
| 10.200                   | 121234                      | 9.6%                    | 133581                      | 4.6%                    |
| 24.648                   | 356625                      | 28.2%                   | 239460                      | 8.3%                    |
| 49.199                   | 491686                      | 38.9%                   | 316226                      | 10.9%                   |

\* Cumulative peak area for PTX (30 µg/mL in release medium A): 1054191; maximum PTX concentration from total content of MAL-PTX<sub>2</sub>S@Pba NP samples: 35.95 µg/mL.

\*\* Cumulative peak area for Pba (15 µg/mL in release medium A): 4386975; maximum Pba concentration from total content of MAL-PTX<sub>2</sub>S@Pba NP samples: 9.88 µg/mL.

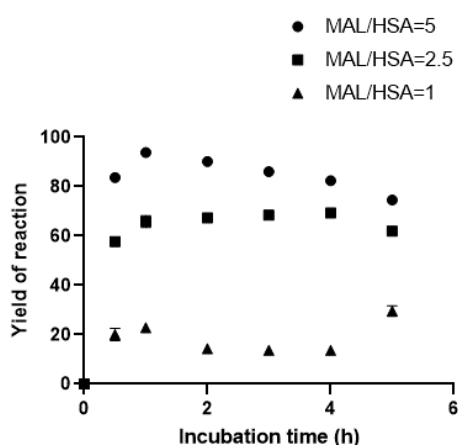

**Figure S9.** Dose and time-dependent adduct formation between MAL and HSA.

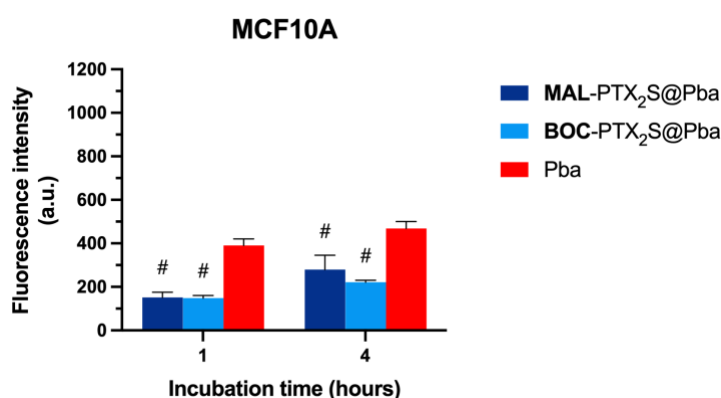

**Figure S10.** *In vitro* uptake of the different Pba formulations in MCF10A cells cultured as monolayers. Cells were incubated for 1 or 4h with 0.25 µM of Pba dissolved in the standard solvent or loaded in MAL-PTX<sub>2</sub>S@Pba or in BOC-PTX<sub>2</sub>S@Pba, and the uptake of Pba was measured by flow cytometry at the end of incubation times. Data are expressed as mean percentage ± SD of least two independent experiments, carried out in triplicate. Statistical significance was calculated applying the two-way ANOVA with Bonferroni's correction: # significantly different from Pba.



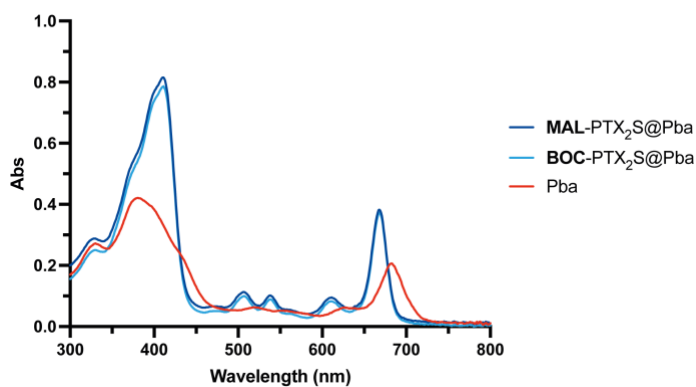

**Figure S11.** Absorption spectra of 10  $\mu\text{M}$  Pba, **MAL-PTX<sub>2</sub>S@Pba** and **BOC-PTX<sub>2</sub>S@Pba** diluted in water.

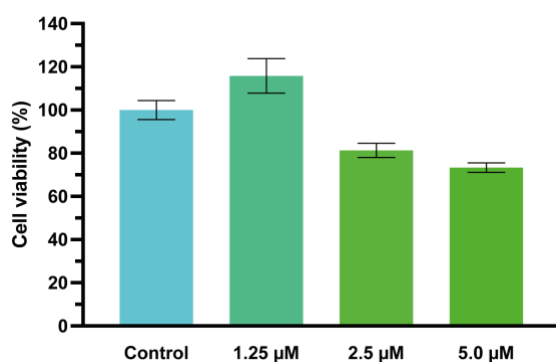

**Figure S12.** Cytotoxicity measured in 4T1 cells incubated with increasing concentrations of free PTX for 24h and release in drug-free medium for additional 48h before assessing cell viability with the MTS assay. Data are expressed as mean percentage  $\pm$  SD of least three independent experiments, carried out in triplicate.

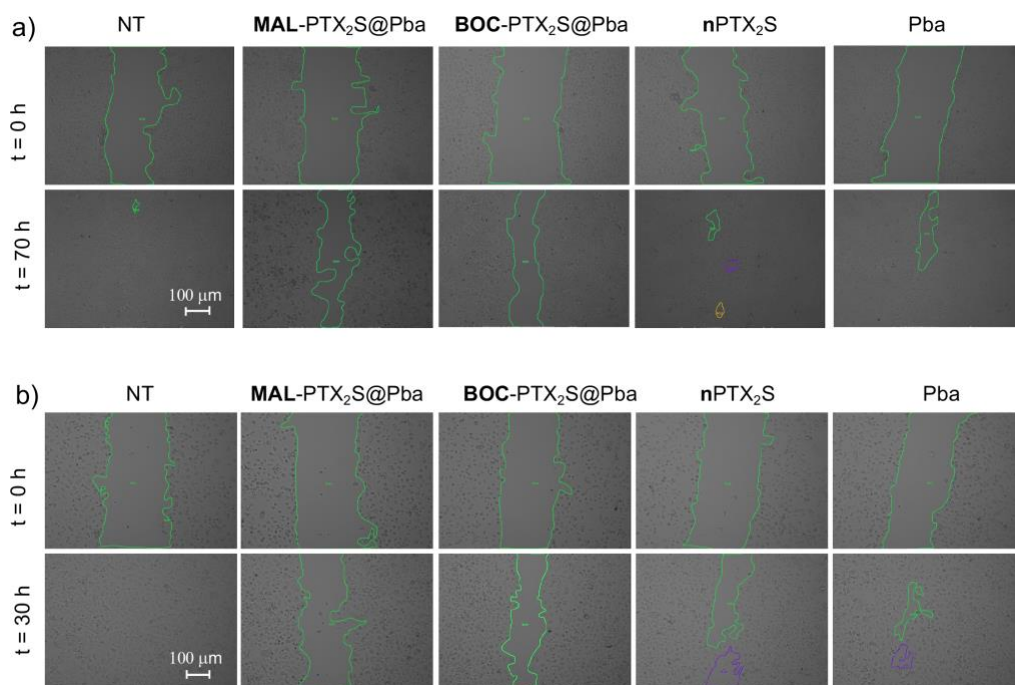

**Figure S13.** The motility of MCF-7 cells (a) and MDA-MB-231 cells (b) was measured by wound healing assay. Phase-contrast microscopy images (scale bar: 100  $\mu\text{M}$ ) at the beginning of the experiment (0h) and the end point (70h for MCF-7 and 30h for MDA-MB-231 cells).

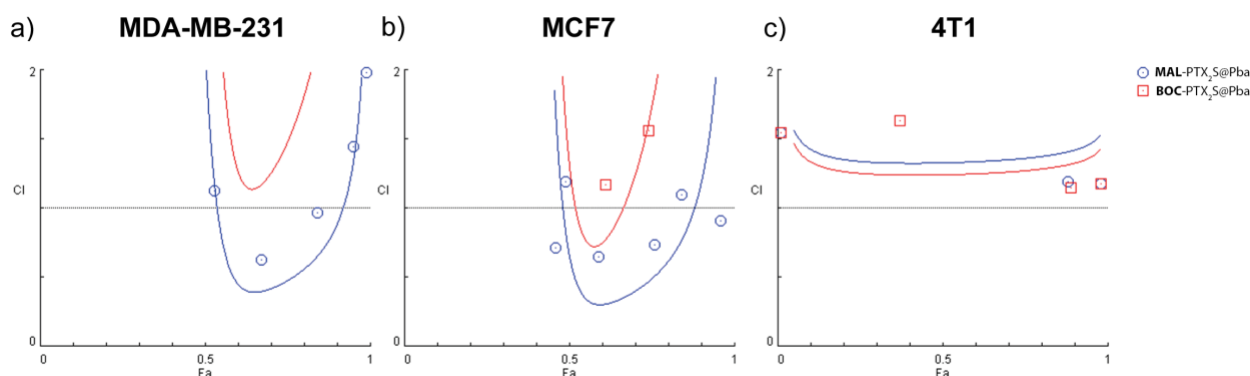

**Figure S14.** Combination index analysis. Fa-CI plots of Combination Index vs. Fa relative to MDA-MB-231, MCF-7 and 4T1 cells treated with the combination of PTX and Pba loaded in MAL-PTX<sub>2</sub>S@Pba or BOC-PTX<sub>2</sub>S@Pba. Data reported in Fig. 5 d-f of the main text were analyzed with the Compusyn software and Fa-CI plots derived.

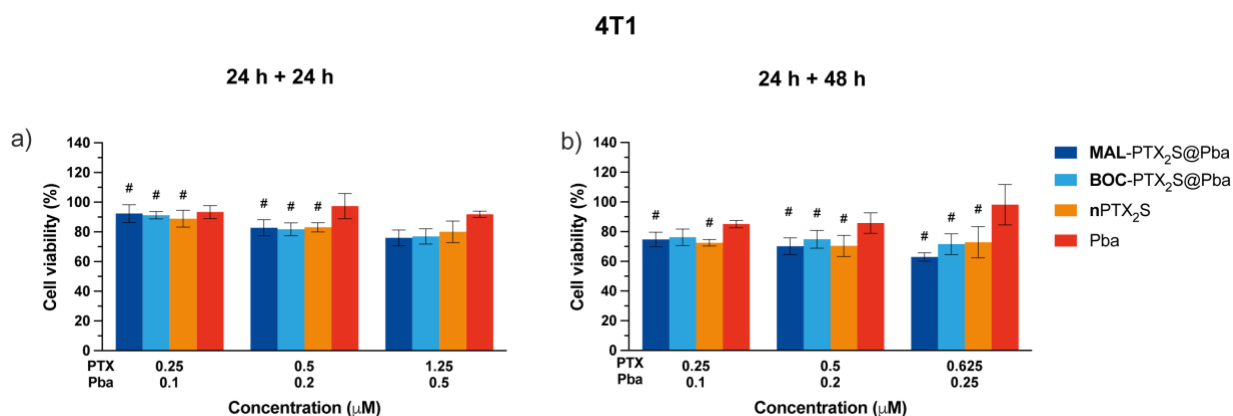

**Figure S15.** Dark cytotoxicity measured in 4T1 spheroids incubated with the different drugs/combinations for 24h and maintained in drug-free medium for additional 24 (a) or 48 (b) h before assessing cell viability by measuring ATP levels with the 3D Glo assay. Data are expressed as mean percentage  $\pm$  SD of at least two independent experiments, carried out in quadruplicate. Statistical significance was calculated applying the ANOVA Two-way with Bonferroni's correction: # significantly different from Pba.

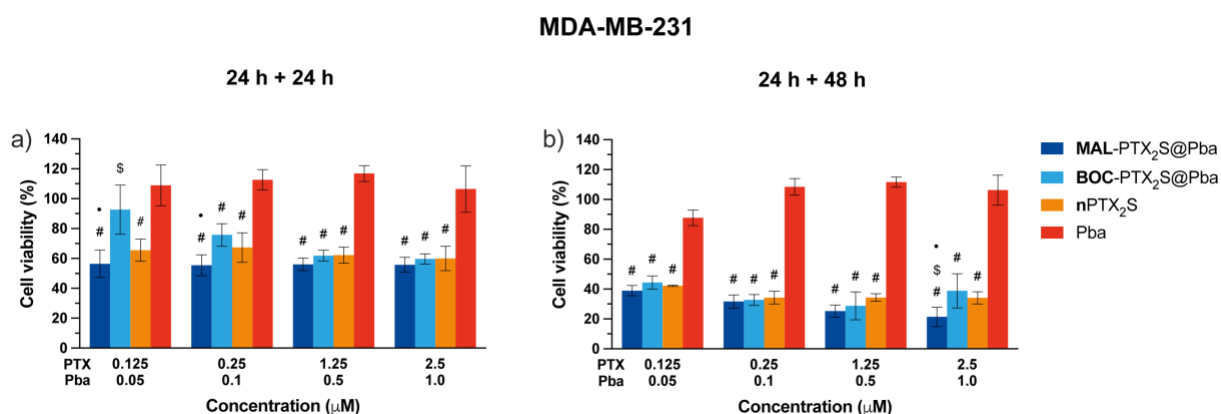

**Figure S16.** Dark cytotoxicity measured in MDA-MB-231 spheroids incubated with the different drugs/combinations for 24h and maintained in drug-free medium for additional 24 (a) or 48 (b) h before assessing cell viability by measuring ATP levels with the 3D Glo assay. Data are expressed as mean percentage  $\pm$  SD of at least two independent experiments, carried out in quadruplicate. Statistical significance was

calculated applying the ANOVA Two-way with Bonferroni's correction: • significantly different from BOC-PTX<sub>2</sub>S@Pba; # significantly different from Pba; \$ significantly different from nPTX<sub>2</sub>S.

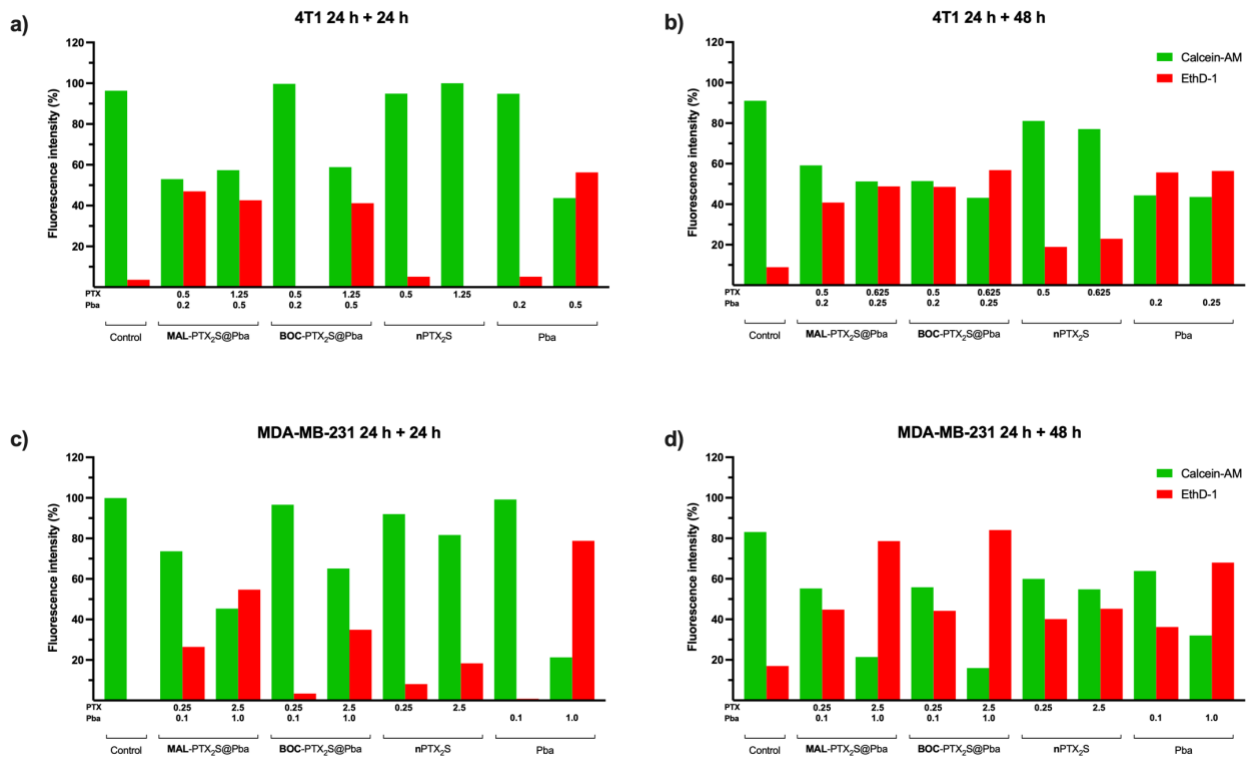

**Figure S17.** Quantification of fluorescence intensity in 4T1 and MDA-MB-231 spheroids stained with the LIVE/DEAD kit. The images reported in Figure 9 (4T1 spheroids) and 10 (MDA-MB-231 spheroids) were quantified using ImageJ software in order to quantify the fluorescence intensity from live cells (stained by calcein AM, green fluorescence) and dead cells (stained by Ethidium homodimer-1 (EthD-1), red fluorescence). a) quantification of images in Fig. 9 c; b) quantification of images in Fig. 9 d; c) quantification of images in Fig. 10 c; d) quantification of images in Fig. 10 d.

**Table S4.** IC<sub>50</sub> values calculated by the Compusyn software from the photo-toxicity data (Figure 6 g,j) of MDA-MB-231 and 4T1 spheroids exposed to the different drug formulations/combinations and irradiated with 1 J/cm<sup>2</sup> of red light.

| Drug formulation           | IC <sub>50</sub> (μM) |             | IC <sub>50</sub> (μM) |             |
|----------------------------|-----------------------|-------------|-----------------------|-------------|
|                            | MDA-MB-231 24+24 h    | 4T1 24+24 h | MDA-MB-231 24+48 h    | 4T1 24+48 h |
| nPTX <sub>2</sub> S        | -                     | -           | 0.12                  | -           |
| Pba                        | 0.27                  | 0.16        | 0.33                  | 0.16        |
| MAL-PTX <sub>2</sub> S@Pba | 0.39                  | 0.78        | 0.12                  | 0.69        |
| BOC-PTX <sub>2</sub> S@Pba | 1.17                  | 0.83        | 0.11                  | 0.58        |

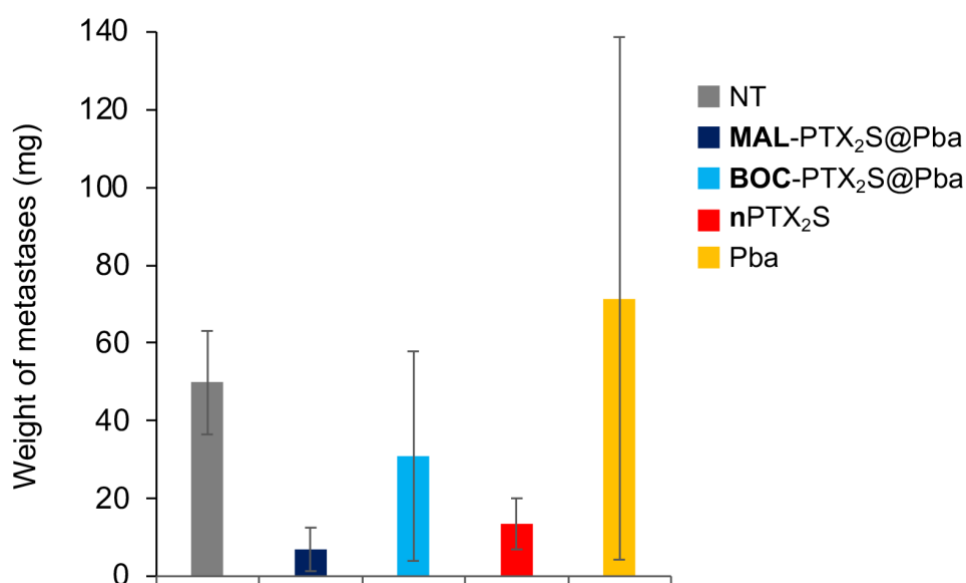

**Figure S18.** Antitumor efficacy on weight of lung metastases. At the sacrifice day, the lungs were harvested to examine weight of metastases by stereomicroscope. Metastasis mass (mg) was calculated assuming a density of 1 and a volume of  $\pi/6 \times a^2 \times b$ , where a and b are the shorter and larger axes (cm), respectively. The results were expressed as the mean  $\pm$  SE (standard error). A statistical difference was observed through the unpaired t-test between group **MAL-PTX<sub>2</sub>S@Pba** (p=0.0038), **BOC-PTX<sub>2</sub>S@Pba** (p=0.006) and **nPTX<sub>2</sub>S** (p=0.003) as respect to untreated group, as well as between **MAL-PTX<sub>2</sub>S@Pba** and **BOC-PTX<sub>2</sub>S@Pba** treatments (p=0.007).
